# Supplementary material
Source: HighWire-hosted journal article supplement (http://rc.rcjournal.com/highwire/filestream/28211/field_highwire_adjunct_files/2/rc-11870-File003.docx)
Supplement: rc-11870-File003.docx [file rc-11870-File003.docx]

Table S3. All HRs with 95% CIs for the other covariates included in multivariable models 5

| Variable | | HR (95% CI) | *P*-value |
| --- | --- | --- | --- |
| Age, year | | 1.17 (1.17, 1.17) | <0.001 |
| Sex, male | | 2.34 (2.28, 2.41) | <0.001 |
| Household income level | |  |  |
|  | Medical aid program group | 1.40 (1.33, 1.47) | <0.001 |
|  | Q1 in quartile (lowest) | 1 |  |
|  | Q2 in quartile | 1.00 (0.95, 1.05) | 0.852 |
|  | Q3 in quartile | 0.95 (0.91, 1.00) | 0.037 |
|  | Q4 in quartile (highest) | 0.87 (0.84, 0.91) | <0.001 |
|  | Unknown | 0.91 (0.81, 1.04) | 0.165 |
| Residence | |  |  |
|  | Urban area | 1 |  |
|  | Rural area | 1.23 (1.20, 1.27) | <0.001 |
| Underlying disability | |  |  |
|  | Mild to moderate | 1.28 (1.23, 1.33) | <0.001 |
|  | Severe | 2.03 (1.94, 2.12) | <0.001 |
| Underlying comorbidity | |  |  |
|  | Congestive heart failure | 1.31 (1.25, 1.37) | <0.001 |
|  | Cardiac arrhythmias | 1.06 (1.02, 1.12) | 0.009 |
|  | Valvular disease | 1.14 (1.03, 1.27) | 0.013 |
|  | Pulmonary circulation disorders | 1.34 (1.20, 1.50) | <0.001 |
|  | Peripheral vascular disorders | 0.89 (0.86, 0.92) | <0.001 |
|  | Hypertension, uncomplicated | 0.92 (0.89, 0.95) | <0.001 |
|  | Hypertension, complicated | 0.91 (0.87, 0.96) | <0.001 |
|  | Paralysis | 1.67 (1.57, 1.78) | <0.001 |
|  | Other neurological disorders | 1.73 (1.66, 1.79) | <0.001 |
|  | Chronic pulmonary disease | 1.22 (1.19, 1.26) | <0.001 |
|  | Diabetes, uncomplicated | 1.15 (1.11, 1.18) | <0.001 |
|  | Diabetes, complicated | 1.20 (1.16, 1.24) | <0.001 |
|  | Hypothyroidism | 0.90 (0.85, 0.96) | 0.001 |
|  | Renal failure | 1.11 (1.04, 1.18) | 0.001 |
|  | Liver disease | 0.91 (0.88, 0.95) | <0.001 |
|  | Peptic ulcer disease, excluding bleeding | 0.89 (0.86, 0.92) | <0.001 |
|  | AIDS/HIV | 0.76 (0.40, 1.47) | 0.419 |
|  | Lymphoma | 1.18 (0.93, 1.49) | 0.168 |
|  | Metastatic cancer | 0.95 (0.82, 1.10) | 0.463 |
|  | Solid tumor without metastasis | 0.92 (0.88, 1.10) | 0.251 |
|  | Rheumatoid arthritis/collagen vascular diseases | 1.07 (1.02, 1.13) | 0.011 |
|  | Coagulopathy | 1.09 (1.00, 1.18) | 0.051 |
|  | Obesity | 0.80 (0.33, 1.93) | 0.621 |
|  | Weight loss | 1.23 (1.13, 1.33) | <0.001 |
|  | Fluid and electrolyte disorders | 1.59 (1.53, 1.66) | <0.001 |
|  | Blood loss anemia | 1.42 (1.19, 1.70) | <0.001 |
|  | Deficiency anemia | 1.31 (1.26, 1.37) | <0.001 |
|  | Alcohol abuse | 1.52 (1.40, 1.65) | <0.001 |
|  | Drug abuse | 1.47 (1.05, 2.06) | 0.024 |
|  | Psychoses | 2.17 (2.05, 2.31) | <0.001 |
|  | Depression | 1.37 (1.32, 1.42) | <0..001 |
| Prescription of other analgesics | |  |  |
|  | Paracetamol | 0.66 (0.63, 0.68) | <0.001 |
|  | NSAIDs | 0.73 (0.71, 0.76) | <0.001 |
|  | Gabapentin or pregabalin | 0.98 (0.94, 1.03) | 0.404 |

HR, hazard ratio; CI, confidence interval; AIDS, Acquired immunodeficiency syndrome; HIV, human immunodeficiency virus; NSAIDs, Nonsteroidal anti-inflammatory drugs
